# Supplementary material
Source: PubMed Central journal article supplement (PMC6641595)
Supplement: ao7b00734_si_001.pdf [file ao7b00734_si_001.pdf]

# *Atomic Structure and Dynamics of Defects in 2D*

## *MoS<sub>2</sub> Bilayers*

*Si Zhou<sup>1</sup>, Shanshan Wang<sup>1</sup>, Huashan Li<sup>2</sup>, Wenshuo Xu<sup>1</sup>, Chuncheng Gong<sup>1</sup>, Jeffrey C. Grossman<sup>2</sup>, Jamie H. Warner<sup>1\*</sup>*

<sup>1</sup>Department of Materials, University of Oxford, 16 Parks Road, Oxford, OX1 3PH, United Kingdom

<sup>2</sup>Department of Materials Science and Engineering, Massachusetts Institute of Technology, 77 Massachusetts Avenue, Cambridge, Massachusetts 02139, United States

Email: \*Jamie.warner@materials.ox.ac.uk

### **S1. Optical and SEM images of monolayer and bilayer regions in MoS<sub>2</sub>**

From the as-grown sample shown in Figure S1a, monolayer and few-layer MoS<sub>2</sub> coexist and are distinguished by optical contrast. Photoluminescence (PL) spectra in Figure S1b are obtained from monolayer and bilayer regions marked by red and black in the inset, respectively, further indicating the coexistence of monolayers and multilayers in our MoS<sub>2</sub> sample. The SEM image in Figure S1c demonstrates nucleation of another MoS<sub>2</sub> layer on top of the monolayer triangles. Low magnification TEM image indicates clear boundaries between monolayer and bilayer regions which matches the optical microscope result (Figure S1d).

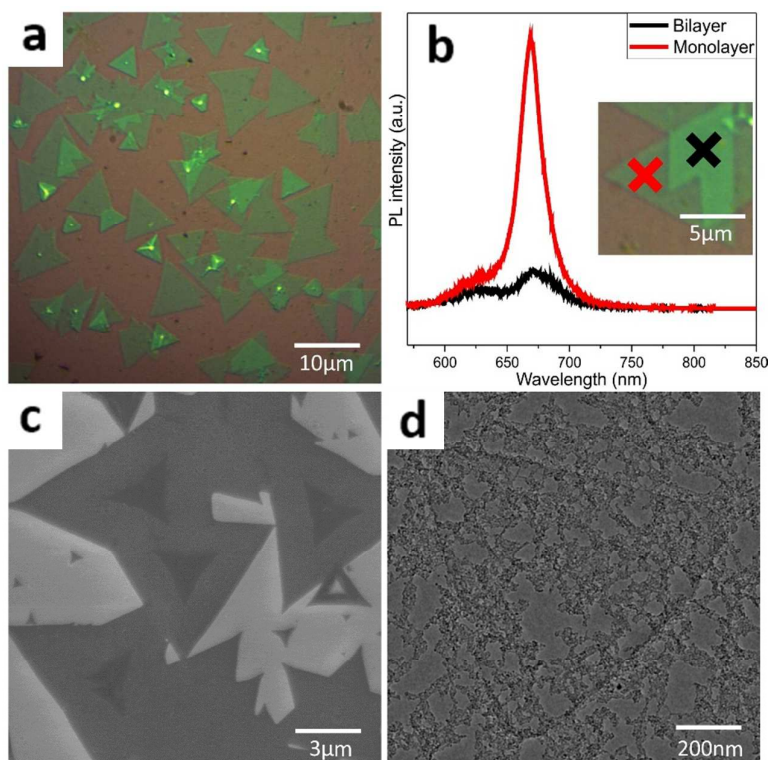

**Figure S1.** (a) Optical image of a CVD growth of typical MoS<sub>2</sub> triangles (a) SiO<sub>2</sub>/Si (300 nm) substrate. (b) Photoluminescence spectra from monolayer and bilayer regions. (c) SEM image of triangular multilayers nucleated on top of monolayer MoS<sub>2</sub>. (d) Low magnification TEM image showing an isolated triangular crystal on top of monolayer MoS<sub>2</sub>.

## S2. AC-TEM images of mono-bilayer interfaces in 2H and 3R MoS<sub>2</sub> bilayers

Two types of mono-bilayer step-edges were found in the AC-TEM images, Figure S2a and S2c, corresponding to 2H and 3R stacking respectively. The 2H stacked bilayer region shows the expected AA' ordering, while the 3R bilayer shows the AB stacking leading to a more complex contrast pattern than the AA'. Multislice image simulations based on the atomic models (Figures S2e-h) match the experimental ones, confirming the two stacking structures, with the line profiles of the experimental and simulated images compared in Figures S2i and j.

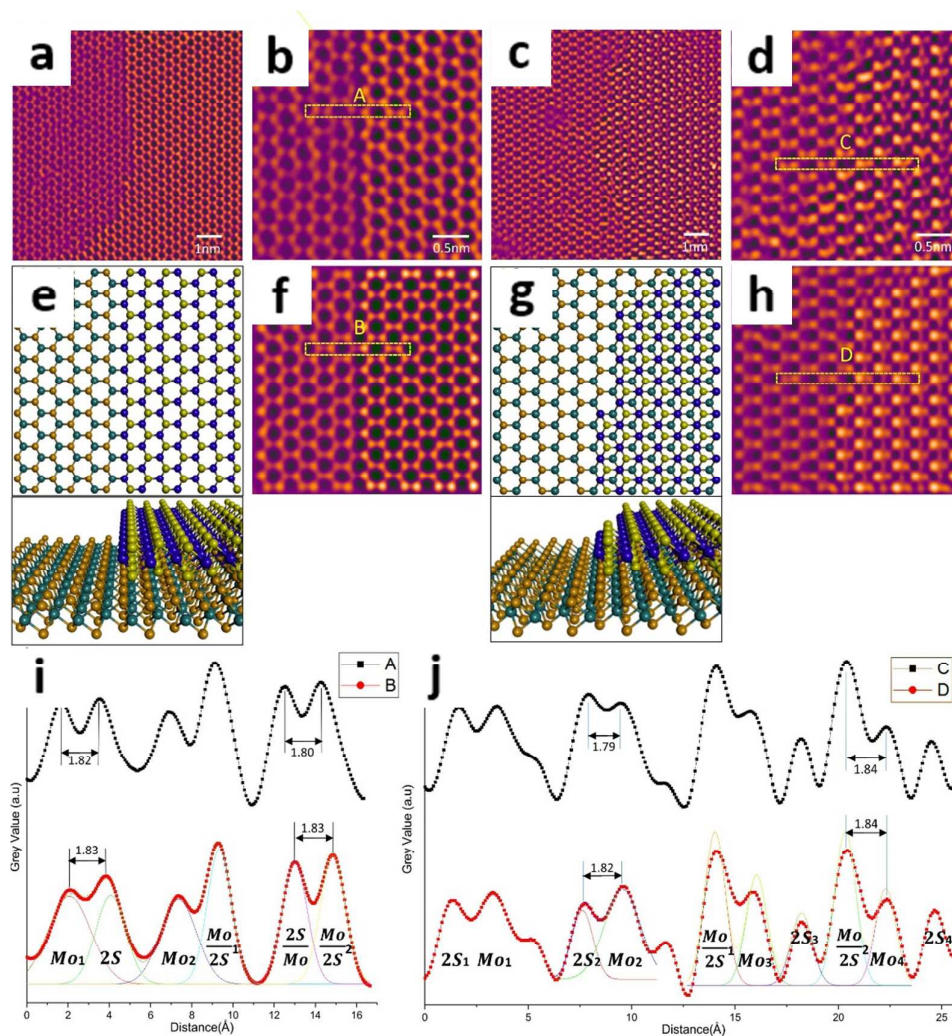

**Figure S2.** AC-TEM images of the MoS<sub>2</sub> monolayer-bilayer step edge for (a, b) 2H stacking and (c, d) 3R stacking. Atomic models from top and 3D view and corresponding multislice image simulations for (e, f) 2H stacking and (g, h) 3R stacking. (i) Boxed line profiles of the step edge in (b) and (f). (j) Boxed line profiles of the step edge in (d) and (h).

### S3. Additional images of Sulphur vacancies in 2H and 3R bilayer MoS<sub>2</sub>

In Figure S3, Line intensity profiles are taken from at least three sites of each type of Sulphur vacancies (SV/DV in 2H bilayer as well as SV<sub>1</sub>/DV<sub>1</sub> and SV<sub>2</sub>/DV<sub>2</sub> in 3R bilayer) in HRTEM images to get average peak intensity ratio. For SV and DV in 2H bilayer, the (2S/Mo)<sub>2</sub>/(Mo/S) and (2S/Mo)<sub>2</sub>/(Mo) ratio falls into 1.16-1.28 and 1.47-1.70. For SV<sub>1</sub>, DV<sub>1</sub>, SV<sub>2</sub> and DV<sub>2</sub> in 3R bilayer, the peak intensity ratio (Mo)<sub>1</sub>/(Mo/S), (Mo)<sub>1</sub>/(Mo)<sub>2</sub>, (S)/(Mo)<sub>2</sub> and (V)/(Mo)<sub>2</sub> (V

stands for vacuum) is in the range of 2.82-3.01, 1.80-2.11, 1.33-1.48 and 1.72-1.82, respectively. The intensity ratio matches that obtained in simulated images in figure 1f and g and figure 5j to m.

#### S4. AC-TEM images of 3R stacked MoS<sub>2</sub> under different focusing conditions

The image frames shown from figure S4a to S4e display the AC-TEM image frames of 3R stacking bilayer MoS<sub>2</sub> under different focusing conditions, with three columns (2S/Mo), (Mo) and (2S) showing varying contrast. Multislice image simulations of 3R bilayer MoS<sub>2</sub> ranging from figure S4f to S4j are conducted using defocus spread of 5nm and various defocus values to match the experimental results. For comparison, the simulated images of 2H bilayer MoS<sub>2</sub> (figure S4k-S4o) are conducted using the same defocus values. This provides additional evidence of the 3R stacking sequence existing in our sample.

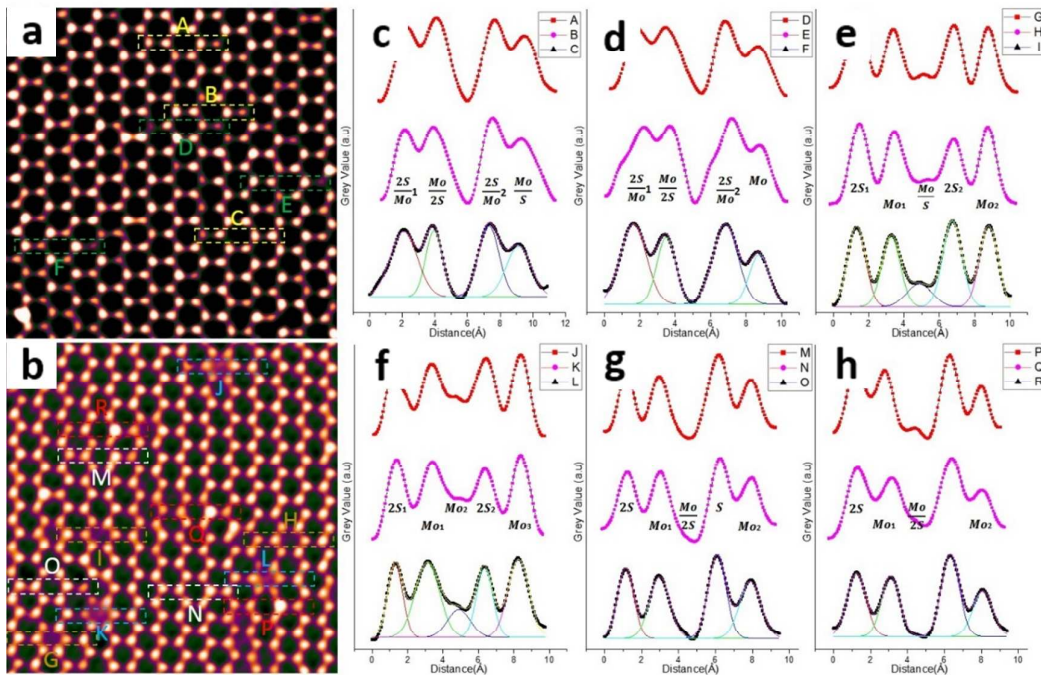

**Figure S3.** AC-TEM image showing SV/DVs in (a) 2H stacked bilayer MoS<sub>2</sub> as dim spot and (b) 3R stacked bilayer MoS<sub>2</sub> as blurry regions and bright spots. Line intensity profile taken along (c) yellow arrows and (d) green arrows in (a). Line intensity profiles taken along (e) brown arrows, (f) blue

arrows, (g) white arrows and (h) red arrows as marked in (b). Gauss fitting is applied for the peak intensity ratio measurement.

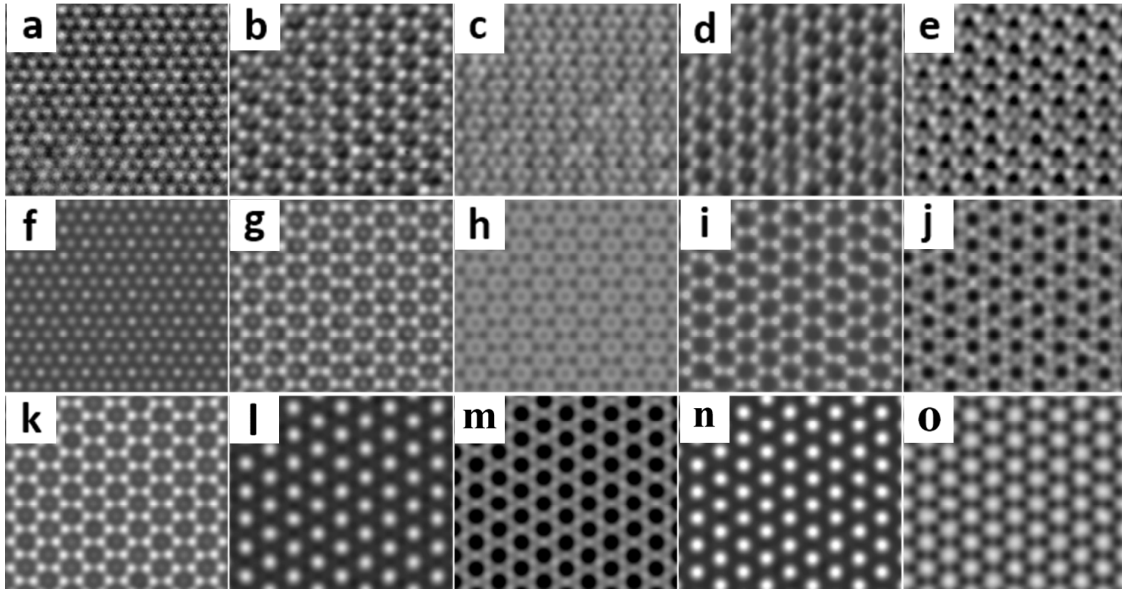

**Figure S4.** (a-e) TEM image showing unique contrast changes of 3R stacked bilayer MoS<sub>2</sub> under various focusing circumstances. Multislice image simulations under defocus value of -2, 7, -9, 10 and 4nm, respectively, for (f-j) 3R and (k-o) 2H stacked bilayer MoS<sub>2</sub>. The defocus spread used is 5nm.

### **S5. Bond length measurement for defective monolayer and defective layer from bilayer**

For monolayer with 1SVL (Figure S5a), the Mo-S bond length along the defective site ranges from 2.333 to 2.579 Å, implying that the maximum increase or shrinkage of bond length compared to pristine crystal (2.420 Å) is 6.6%, which is 3.7% for the defective layer from bilayer as shown in Figure S5b. This proves less in-plane compression introduced by 1SVL in bilayer system. Furthermore, the significant mismatch depicted in Figure 3e mainly derives from the out-of-plane lattice distortion.
